# Supplementary material for: Direct arylation of heterocycles through C–H bond cleavage using metal–organic-framework Cu2(OBA)2(BPY) as an efficient heterogeneous catalyst
Source: Royal Society of Chemistry journal article supplement (doi:10.1039/c4ra09092f), 2014-01-01
Supplement: c4ra09092f1.pdf [file c4ra09092f1.pdf]

**Direct arylation of heterocycles through C-H bond cleavage using metal-organic-  
framework  $\text{Cu}_2(\text{OBA})_2(\text{BPY})$  as an efficient heterogeneous catalyst**

Thanh Truong\*, Vu T. Nguyen, Hue T. X. Le, Nam T. S. Phan\*

Department of Chemical Engineering, HCMC University of Technology, VNU-HCM,

268 Ly Thuong Kiet, District 10, Ho Chi Minh City, Viet Nam

\*Email: [ptsnam@hcmut.edu.vn](mailto:ptsnam@hcmut.edu.vn)

[tvthanh@hcmut.edu.vn](mailto:tvthanh@hcmut.edu.vn)

Ph: (+84 8) 38647256 ext. 5681

Fx: (+84 8) 38637504

**Supporting Information**

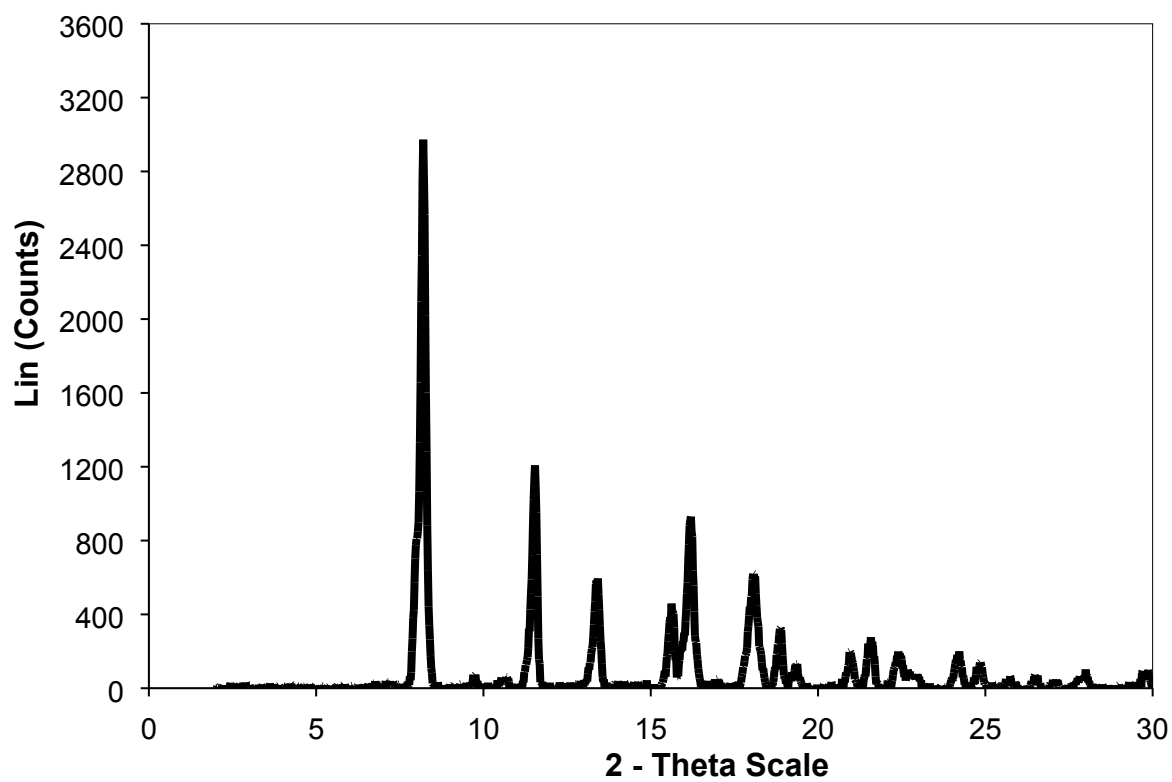

Fig. S1. X-ray powder diffractograms of the  $\text{Cu}_2(\text{OBA})_2(\text{BPY})$ .

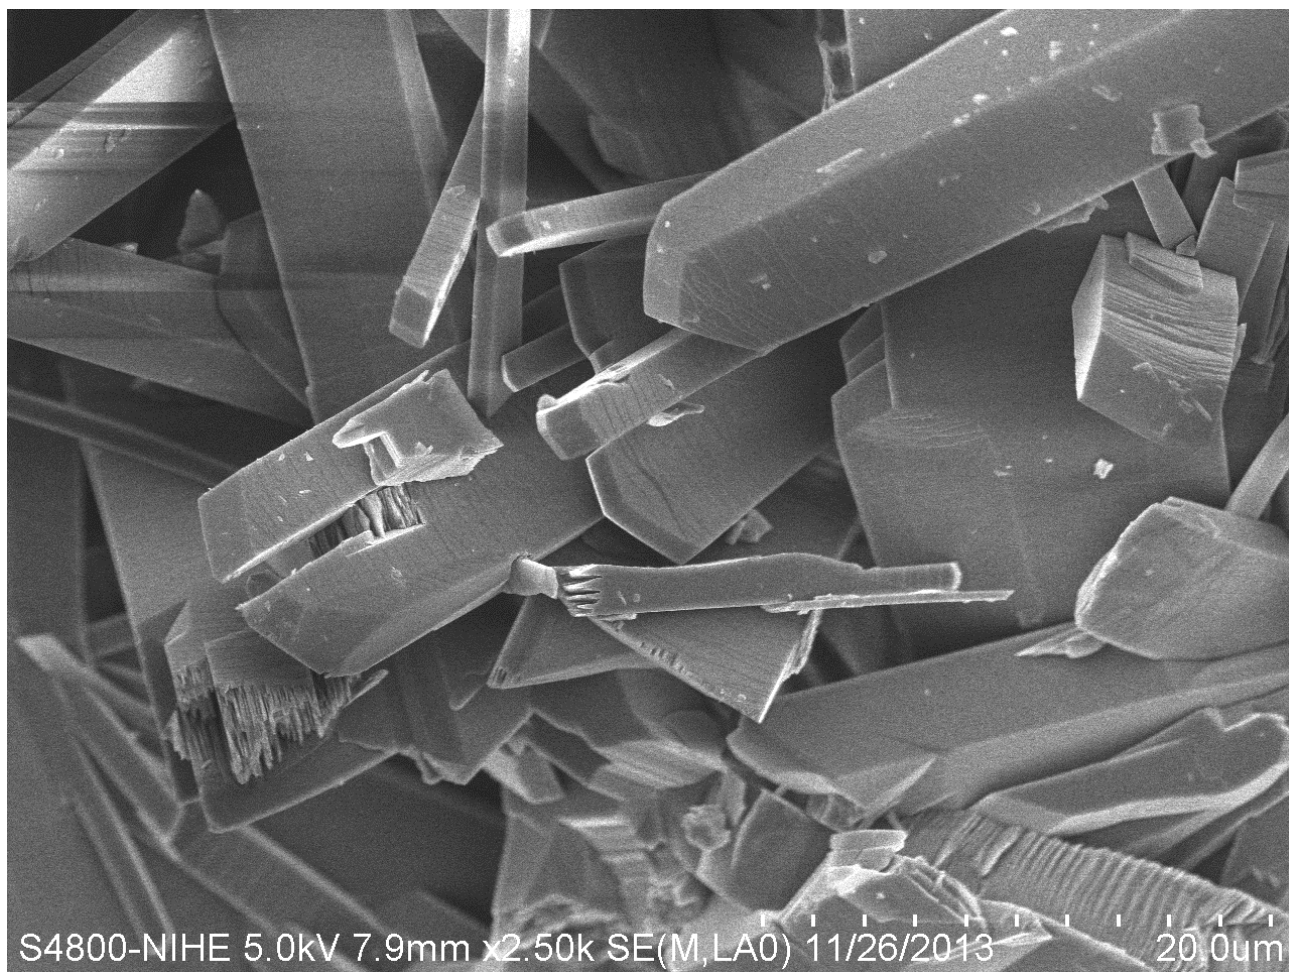

Fig. S2. SEM micrograph of the  $\text{Cu}_2(\text{OBA})_2(\text{BPY})$ .

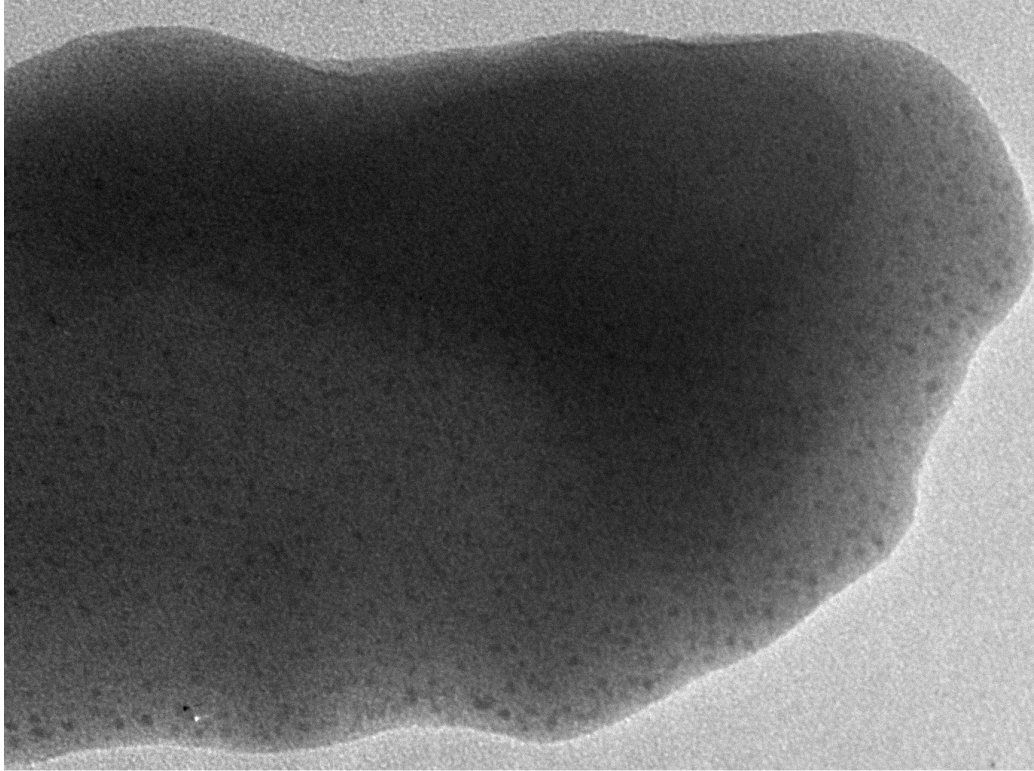

Hue T.005

Print Mag: 208000x @ 51 mm

12:06:09 p 11/27/13

TEM Mode: Imaging

20 nm

HV=80.0kV

Direct Mag: 100000x

Fig. S3. TEM micrograph of the  $\text{Cu}_2(\text{OBA})_2(\text{BPY})$ .

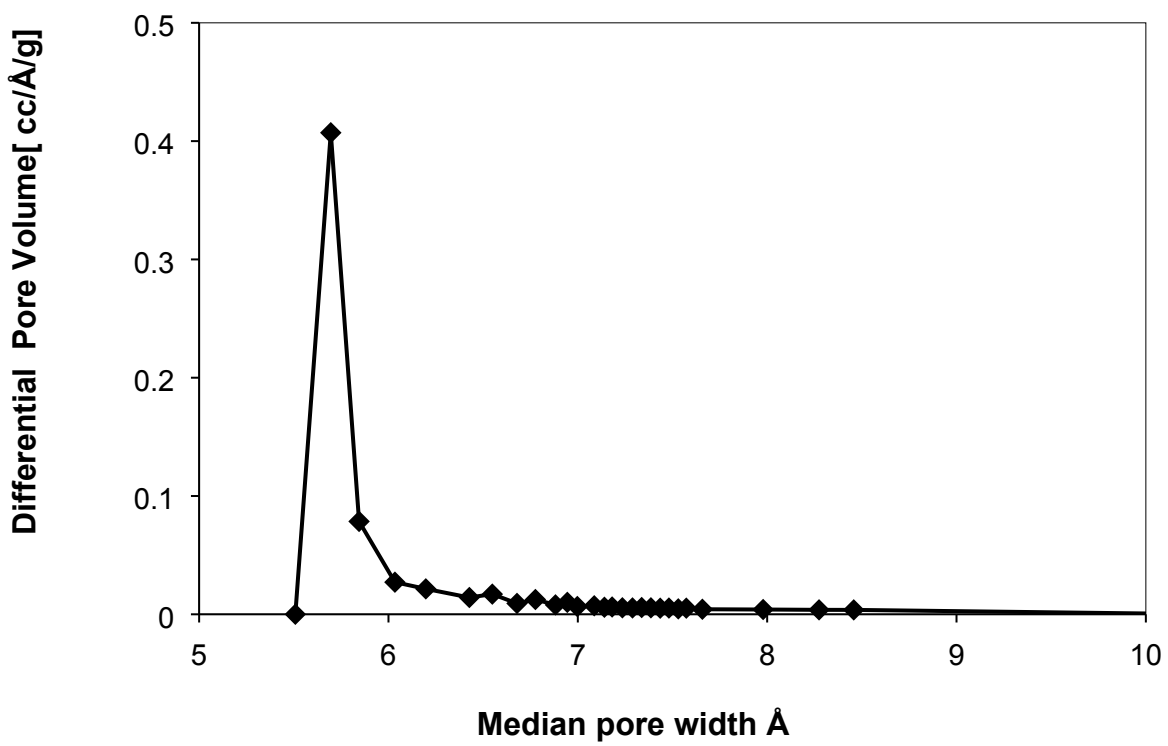

Fig. S4. Pore size distribution of the fresh  $\text{Cu}_2(\text{OBA})_2(\text{BPY})$ .

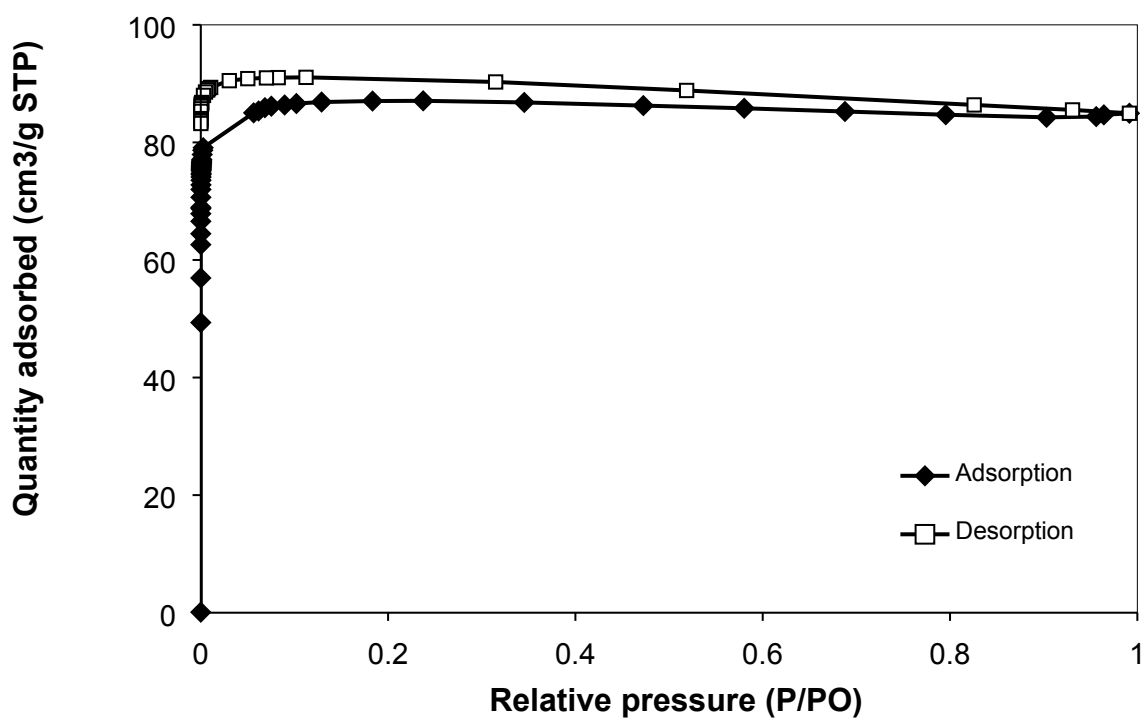

Fig. S5. Nitrogen adsorption/desorption isotherm of the  $\text{Cu}_2(\text{OBA})_2(\text{BPY})$ . Adsorption data are shown as closed circles and desorption data as open circles.

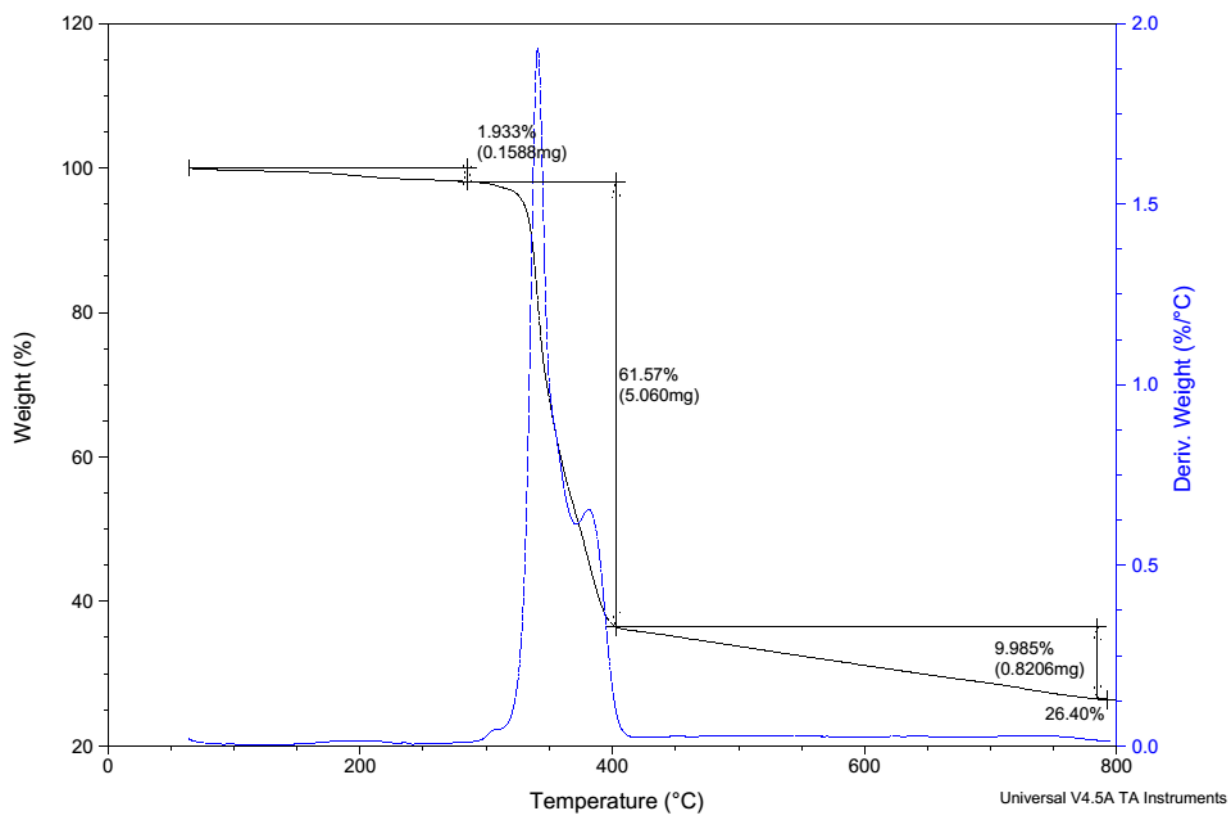

Fig. S6. TGA analysis of the  $\text{Cu}_2(\text{OBA})_2(\text{BPY})$ .

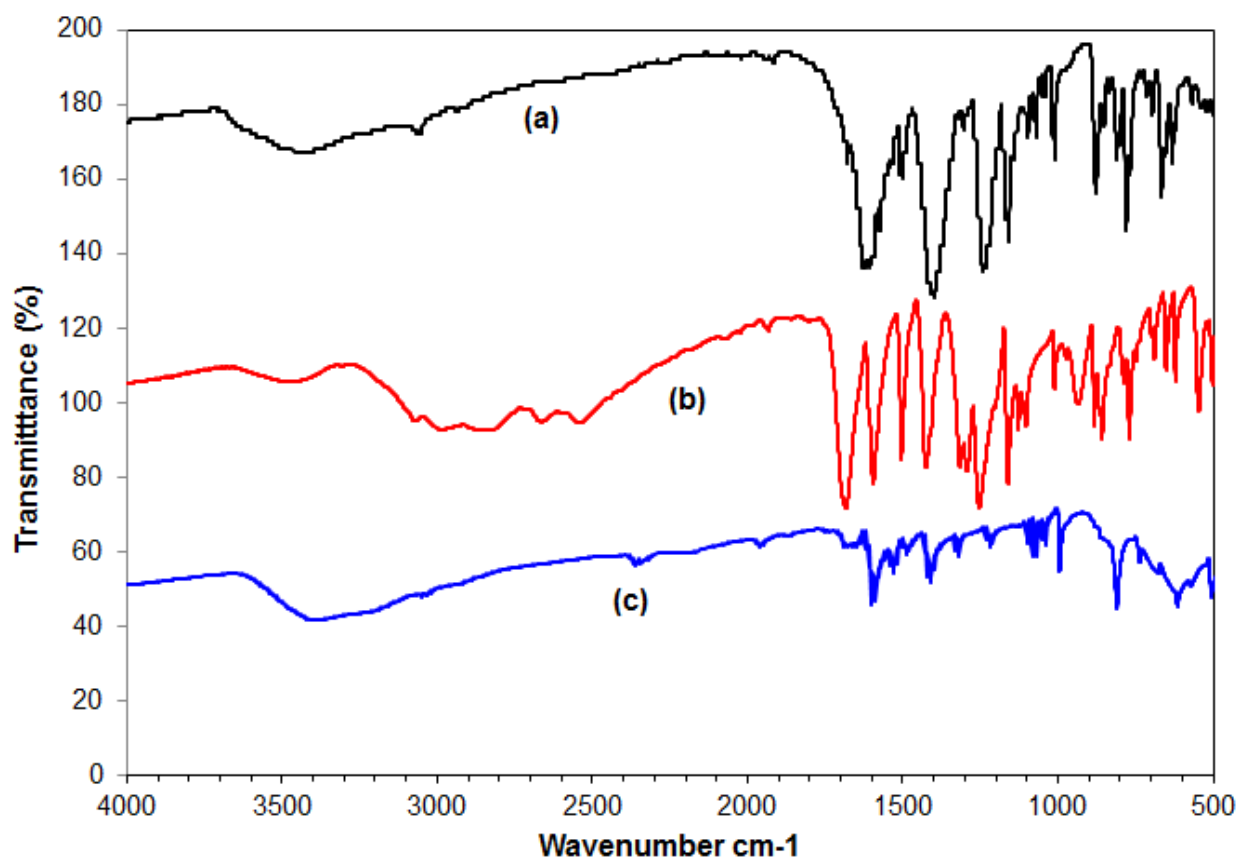

Fig. S7. FT-IR spectra of the  $\text{Cu}_2(\text{OBA})_2(\text{BPY})$  (a),  $\text{H}_2\text{OBA}$  (b), 4,4 – bipyridine (c)



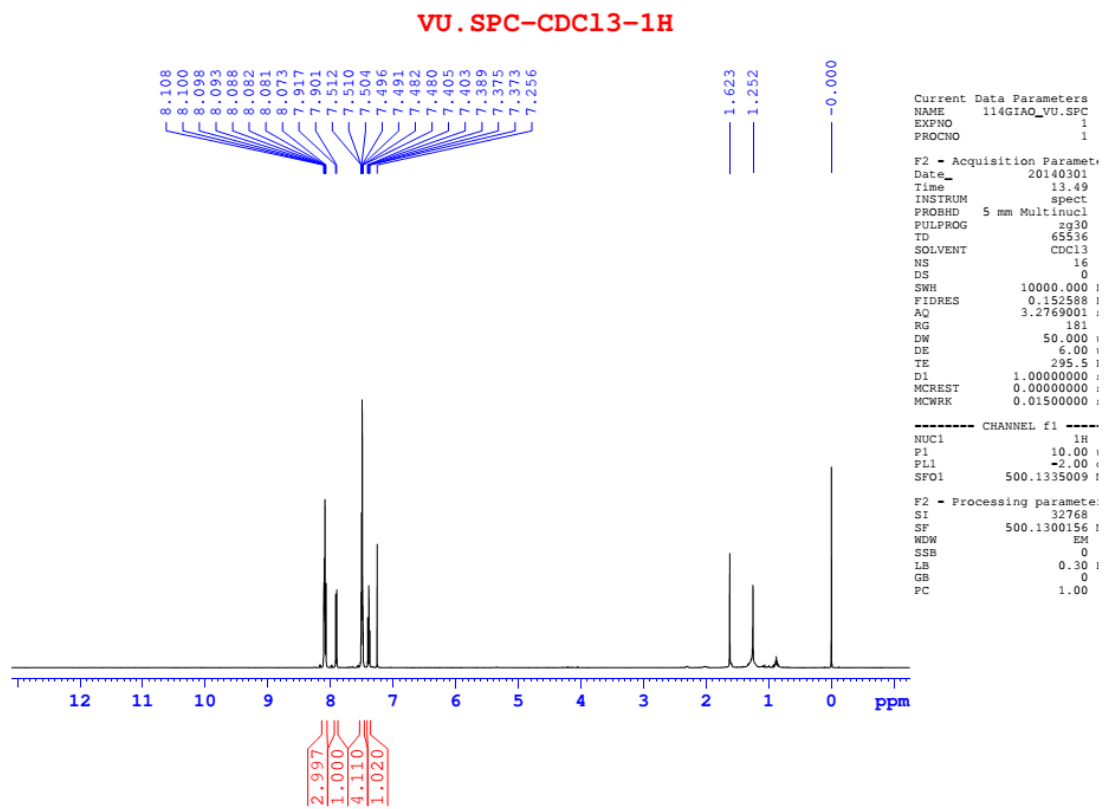

Fig. S8. <sup>1</sup>H-NMR spectra of 2-phenylbenzothiazole

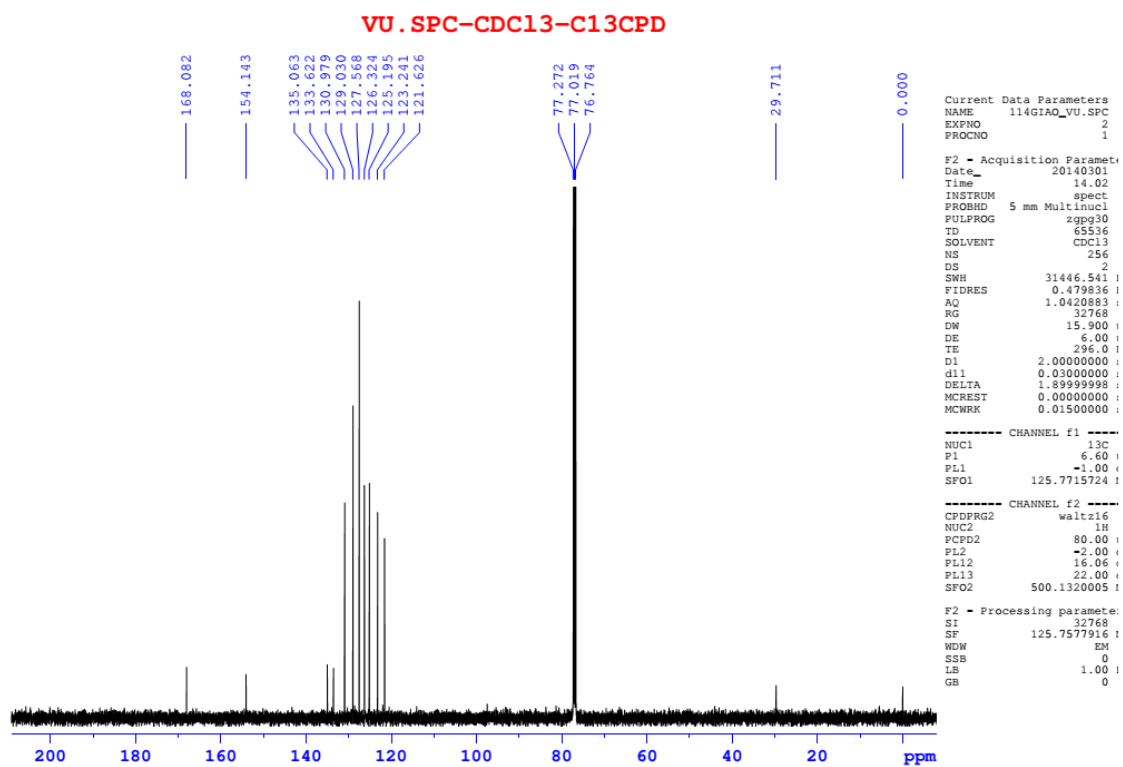

Fig. S9.  $^{13}\text{C}$ -NMR spectra of 2-phenylbenzothiazole

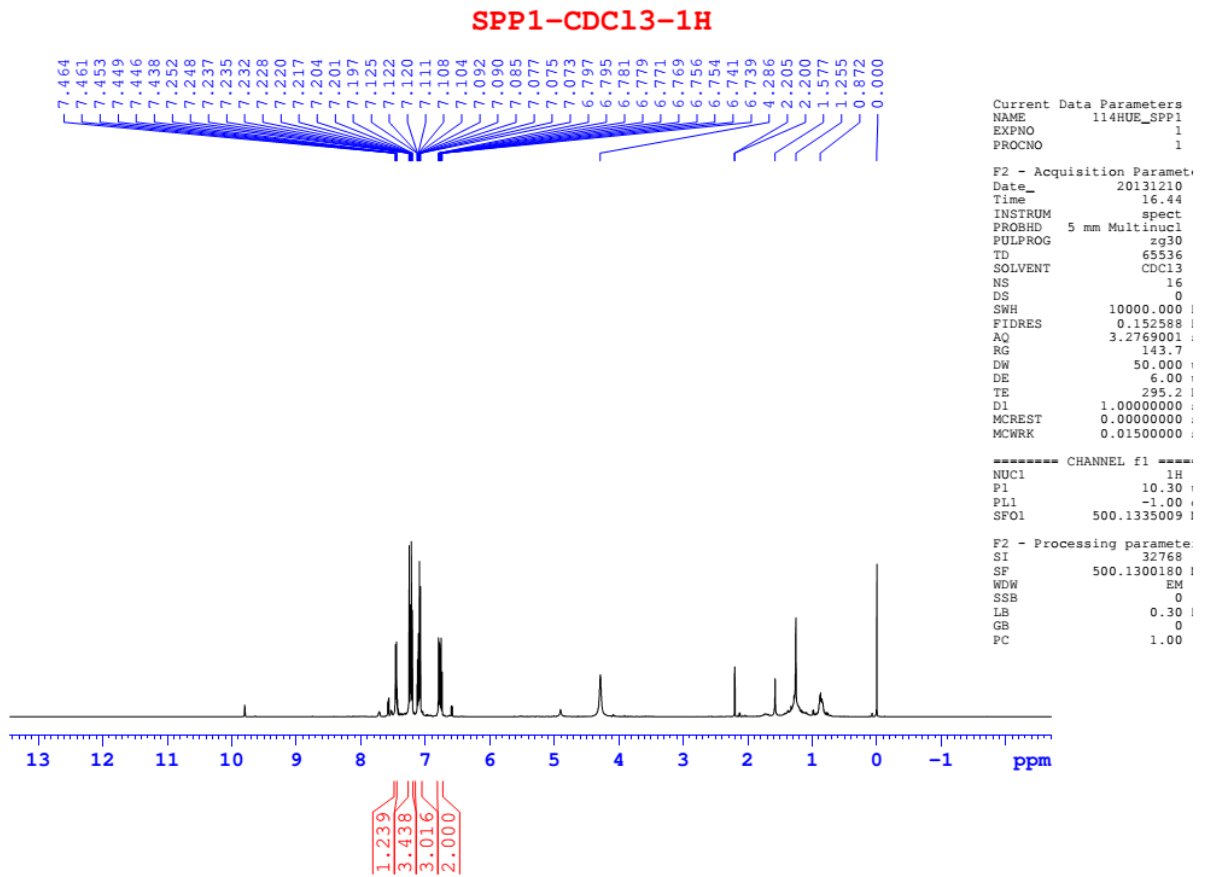

Fig. S10. <sup>1</sup>H-NMR spectra of 2-(phenylthio)benzenamine

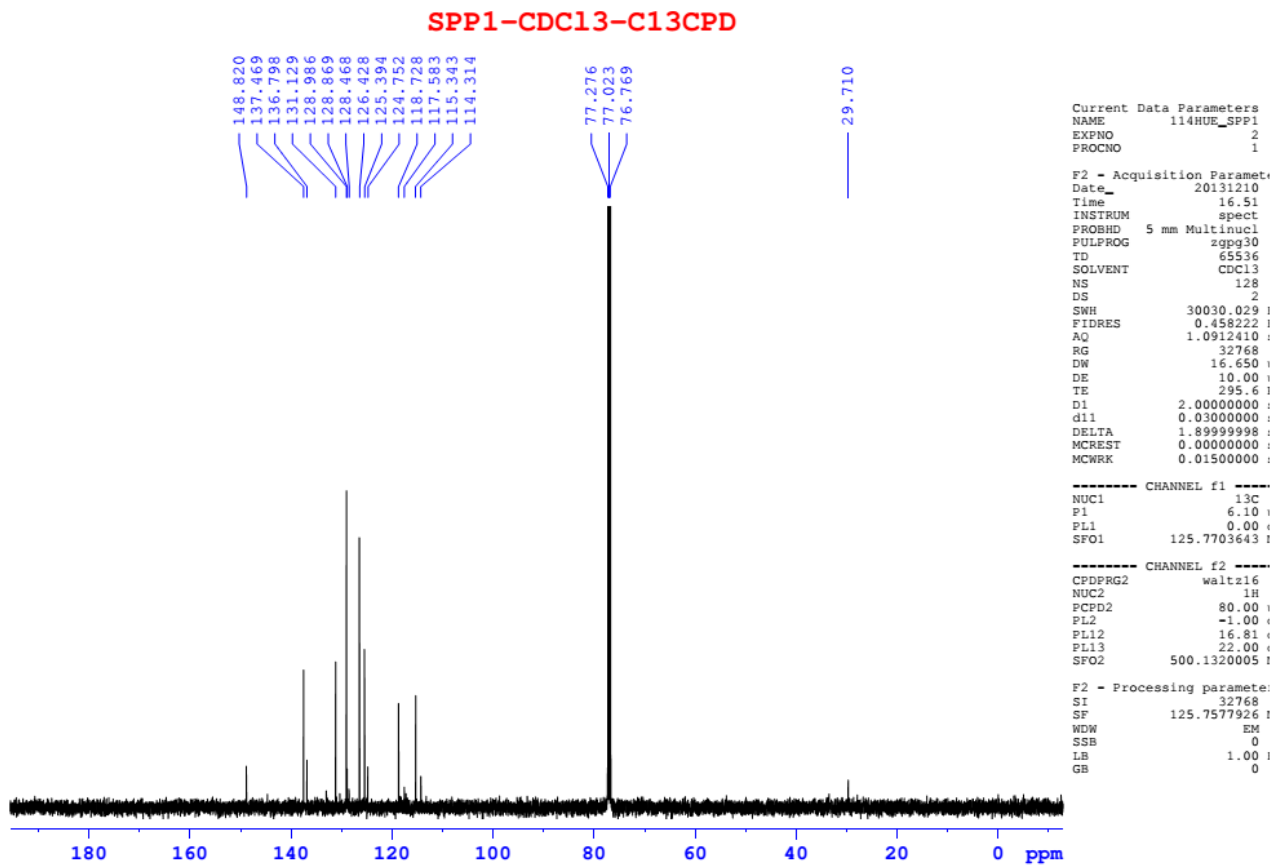

Fig. S11.  $^{13}\text{C}$ -NMR spectra of 2-(phenylthio)benzenamine
